# Supplementary material
Source: HighWire-hosted journal article supplement (https://cmajopen-stage.highwire.org/highwire/filestream/84073/field_highwire_adjunct_files/2/2020-0048-3-at.pdf)
Supplement: 2020-0048-3-at.pdf [file 2020-0048-3-at.pdf]

**Appendix 3**

**Supplemental Table S1. Rates of Major Amputation related to Diabetes**

| Region <sup>a</sup>      | Major Amputations related to Diabetes per 100,000 person-quarters <sup>a</sup><br>(95% Confidence Interval) <sup>b</sup> |
|--------------------------|--------------------------------------------------------------------------------------------------------------------------|
| 6- MISSISSAUGA HALTON    | 1.95 (1.75-2.15)                                                                                                         |
| 8- CENTRAL               | 2.65 (2.46-2.84)                                                                                                         |
| 5- CENTRAL WEST          | 3.34 (3.02-3.66)                                                                                                         |
| 11- CHAMPLAIN            | 3.38 (3.12-3.64)                                                                                                         |
| 7- TORONTO CENTRAL       | 3.43 (3.16-3.71)                                                                                                         |
| 9- CENTRAL EAST          | 4.34 (4.08-4.61)                                                                                                         |
| 3- WATERLOO WELLINGTON   | 4.35 (3.95-4.76)                                                                                                         |
| 1- ERIE ST. CLAIR        | 4.36 (3.94-4.78)                                                                                                         |
| 12- NORTH SIMCOE MUSKOKA | 5.00 (4.47-5.53)                                                                                                         |
| 2- SOUTH WEST            | 5.20 (4.81-5.59)                                                                                                         |
| 10- SOUTH EAST           | 5.33 (4.80-5.86)                                                                                                         |
| 4- HAMILTON NIAGARA      | 5.72 (5.39-6.04)                                                                                                         |
| 13- NORTH-EAST           | 7.21 (6.64-7.79)                                                                                                         |
| 14- NORTH-WEST           | 10.45 (9.37-11.52)                                                                                                       |

<sup>a</sup> Rate reflects average over 2007-2017 study period and among residents  $\geq 40$  years old

<sup>b</sup> Ninety-five percent confidence intervals around the amputation rates were calculated assuming a negative binomial distribution accounting for recurrent events (i.e. repeat amputations in distinct quarters) over the study period (Glynn RJ, et al. Am J Epidemiol. 1993 Apr 1;137(7):776-86).

**Supplemental Table S2. Major Diabetic Amputee Cohort Characteristics by Region**

| Region <sup>a</sup>      | No. of major amputees | Lowest income quintile - N (%) | Rural residence - N (%) | Comorbidity index <sup>b</sup> - Median (interquartile range) | Death on index amputation admission - N (%) |
|--------------------------|-----------------------|--------------------------------|-------------------------|---------------------------------------------------------------|---------------------------------------------|
| 6- MISSISSAUGA HALTON    | 350                   | 58 (16.6%)                     | ≤5 (≤1.1%)              | 13 (7-24)                                                     | 41 (11.7%)                                  |
| 8- CENTRAL               | 722                   | 190 (26.4%)                    | 10 (1.4%)               | 13 (6-21)                                                     | 96 (13.3%)                                  |
| 5- CENTRAL WEST          | 389                   | 85 (21.9%)                     | 10 (2.6%)               | 13 (5-22)                                                     | 48 (12.3%)                                  |
| 11- CHAMPLAIN            | 709                   | 176 (25.1%)                    | 137 (19.3%)             | 14 (7-21)                                                     | 80 (11.3%)                                  |
| 7- TORONTO CENTRAL       | 649                   | 230 (35.9%)                    | 0 (0.0%)                | 15 (7-23)                                                     | 72 (11.1%)                                  |
| 9- CENTRAL EAST          | 1,146                 | 370 (32.3%)                    | 95 (8.3%)               | 13 (5-21)                                                     | 129 (11.3%)                                 |
| 3- WATERLOO WELLINGTON   | 482                   | 129 (26.8%)                    | 51 (10.6%)              | 13 (6-21)                                                     | 37 (7.7%)                                   |
| 1- ERIE ST. CLAIR        | 483                   | 140 (29.4%)                    | 63 (13.0%)              | 11 (4-18)                                                     | 46 (9.5%)                                   |
| 12- NORTH SIMCOE MUSKOKA | 398                   | 94 (23.7%)                     | 150 (37.8%)             | 13 (4-23)                                                     | 39 (9.8%)                                   |
| 2- SOUTH WEST            | 834                   | 234 (28.8%)                    | 293 (35.1%)             | 12 (4-22)                                                     | 78 (9.4%)                                   |
| 10- SOUTH EAST           | 487                   | 160 (33.1%)                    | 209 (42.9%)             | 12 (4-21)                                                     | 45 (9.2%)                                   |
| 4- HAMILTON NIAGARA      | 1,399                 | 450 (32.6%)                    | 84 (6.0%)               | 12 (5-20)                                                     | 159 (11.4%)                                 |
| 13- NORTH-EAST           | 769                   | 248 (33.7%)                    | 318 (41.4%)             | 11 (3-20)                                                     | 86 (11.2%)                                  |
| 14- NORTH-WEST           | 415                   | 142 (34.8%)                    | 178 (42.9%)             | 11 (4-19)                                                     | 49 (11.8%)                                  |

<sup>a</sup> Regions are ordered from lowest to highest major amputation rate

<sup>b</sup> Aggregated Diagnosis Group Comorbidity Index

**Supplemental Table S3. Regional provider counts, per 100,000 residents at least 40 years old, in 2013**

| Region <sup>a</sup>      | Vascular Surgeons | Orthopedic Surgeons | General Surgeons | Vascular, Orthopedic or General Surgeons | Podiatrists-Chiroprodists |
|--------------------------|-------------------|---------------------|------------------|------------------------------------------|---------------------------|
| 6- MISSISSAUGA HALTON    | 0.70              | 5.61                | 9.63             | 15.94                                    | 20.49                     |
| 8- CENTRAL               | 0.56              | 8.31                | 11.90            | 20.77                                    | 14.82                     |
| 5- CENTRAL WEST          | 0.00              | 5.78                | 8.29             | 14.07                                    | 18.59                     |
| 11- CHAMPLAIN            | 1.23              | 10.89               | 14.27            | 26.39                                    | 3.68                      |
| 7- TORONTO CENTRAL       | 1.86              | 15.02               | 16.54            | 33.42                                    | 36.63                     |
| 9- CENTRAL EAST          | 0.50              | 7.77                | 9.39             | 17.66                                    | 14.40                     |
| 3- WATERLOO WELLINGTON   | 0.83              | 6.64                | 9.96             | 17.44                                    | 12.73                     |
| 1- ERIE ST. CLAIR        | 0.30              | 6.53                | 12.17            | 18.99                                    | 12.76                     |
| 12- NORTH SIMCOE MUSKOKA | 0.40              | 5.53                | 11.46            | 17.38                                    | 14.22                     |
| 2- SOUTH WEST            | 0.80              | 12.44               | 14.25            | 27.49                                    | 9.63                      |
| 10- SOUTH EAST           | 0.72              | 12.56               | 9.69             | 22.97                                    | 25.12                     |
| 4- HAMILTON NIAGARA      | 0.93              | 9.21                | 13.75            | 23.89                                    | 14.15                     |
| 13- NORTH-EAST           | 0.00              | 8.50                | 14.80            | 23.30                                    | 11.02                     |
| 14- NORTH-WEST           | 0.00              | 9.73                | 15.40            | 25.13                                    | 7.30                      |

<sup>a</sup> Regions are ordered from lowest to highest major amputation rate

**Supplemental Table S4. Physician and Publicly-Funded Podiatry Visits within 30-365 days prior to Index Diabetic Amputation Admission**

| Region <sup>a</sup>      | No. of Amputees | GP <sup>b</sup>          | Vascular Surgeon | Orthopedic Surgeon | General Surgeon | Vascular, Orthopedic or General Surgeon | Other Specialist Physician | Publicly-Funded Podiatry <sup>c</sup> |
|--------------------------|-----------------|--------------------------|------------------|--------------------|-----------------|-----------------------------------------|----------------------------|---------------------------------------|
|                          |                 | At least 1 Visit - N (%) |                  |                    |                 |                                         |                            |                                       |
| 6- MISSISSAUGA HALTON    | 350             | 326<br>(93.1%)           | 215<br>(61.4%)   | 87<br>(24.9%)      | 57<br>(16.3%)   | 269<br>(76.9%)                          | 332<br>(94.9%)             | ≤5<br>(≤1.4%)                         |
| 8- CENTRAL               | 722             | 687<br>(95.2%)           | 367<br>(50.8%)   | 190<br>(26.3%)     | 184<br>(25.5%)  | 516<br>(71.5%)                          | 681<br>(94.3%)             | 59<br>(8.2%)                          |
| 5- CENTRAL WEST          | 389             | 362<br>(93.1%)           | 167<br>(42.9%)   | 89<br>(22.9%)      | 151<br>(38.8%)  | 269<br>(69.2%)                          | 359<br>(92.3%)             | 14<br>(3.6%)                          |
| 11- CHAMPLAIN            | 709             | 665<br>(93.8%)           | 350<br>(49.4%)   | 151<br>(21.3%)     | 170<br>(24.0%)  | 488<br>(68.8%)                          | 654<br>(92.2%)             | 6<br>(0.8%)                           |
| 7- TORONTO CENTRAL       | 649             | 587<br>(90.4%)           | 369<br>(56.9%)   | 155<br>(23.9%)     | 63<br>(9.7%)    | 443<br>(68.3%)                          | 599<br>(92.3%)             | 46<br>(7.1%)                          |
| 9- CENTRAL EAST          | 1,146           | 1,097<br>(95.7%)         | 631<br>(55.1%)   | 233<br>(20.3%)     | 183<br>(16.0%)  | 789<br>(68.8%)                          | 1,069<br>(93.3%)           | 41<br>(3.6%)                          |
| 3- WATERLOO WELLINGTON   | 482             | 468<br>(97.1%)           | 237<br>(49.2%)   | 137<br>(28.4%)     | 113<br>(23.4%)  | 338<br>(70.1%)                          | 459<br>(95.2%)             | 34<br>(7.1%)                          |
| 1- ERIE ST. CLAIR        | 483             | 455<br>(94.2%)           | 217<br>(44.9%)   | 117<br>(24.2%)     | 139<br>(28.8%)  | 350<br>(72.5%)                          | 451<br>(93.4%)             | ≤5<br>(≤1.0%)                         |
| 12- NORTH SIMCOE MUSKOKA | 398             | 388<br>(97.5%)           | 115<br>(28.9%)   | 117<br>(29.4%)     | 141<br>(35.4%)  | 266<br>(66.8%)                          | 379<br>(95.2%)             | 6<br>(1.5%)                           |
| 2- SOUTH WEST            | 834             | 794<br>(95.2%)           | 314<br>(37.6%)   | 166<br>(19.9%)     | 277<br>(33.2%)  | 570<br>(68.3%)                          | 784<br>(94.0%)             | 13<br>(1.6%)                          |
| 10- SOUTH EAST           | 487             | 457<br>(93.8%)           | 208<br>(42.7%)   | 147<br>(30.2%)     | 85<br>(17.5%)   | 325<br>(66.7%)                          | 454<br>(93.2%)             | ≤5<br>(≤1%)                           |
| 4- HAMILTON NIAGARA      | 1,399           | 1,333<br>(95.3%)         | 585<br>(41.8%)   | 503<br>(36.0%)     | 417<br>(29.8%)  | 987<br>(70.6%)                          | 1,330<br>(95.1%)           | 48<br>(3.4%)                          |
| 13- NORTH-EAST           | 769             | 739<br>(96.1%)           | 447<br>(58.1%)   | 137<br>(17.8%)     | 346<br>(45.0%)  | 644<br>(83.7%)                          | 739<br>(96.1%)             | 18<br>(2.3%)                          |
| 14- NORTH-WEST           | 415             | 379<br>(91.3%)           | 17<br>(4.1%)     | 123<br>(29.6%)     | 151<br>(36.4%)  | 233<br>(56.1%)                          | 396<br>(95.4%)             | 0<br>(0.0%)                           |

<sup>a</sup> Regions are ordered from lowest to highest major amputation rate

<sup>b</sup> General Practitioner

<sup>c</sup> The majority of podiatry and chiropody services are not publicly funded in Ontario

**Supplemental Table S5. Health Services within 365 Days Prior to Index Diabetic Amputation Admission**

| Region <sup>a</sup>      | No. of Amputees | At least one Hospitalization<br>- N (%) | At least one ED <sup>b</sup> visit<br>- N (%) | Home care nursing<br>- N (%) | Revascularization<br>- N (%) |                |                      | Minor <sup>c</sup> Amputation<br>- N (%) | Total Health Care Costs <sup>d</sup><br>- Mean |
|--------------------------|-----------------|-----------------------------------------|-----------------------------------------------|------------------------------|------------------------------|----------------|----------------------|------------------------------------------|------------------------------------------------|
|                          |                 |                                         |                                               |                              | Open surgery                 | Endovascular   | Open or endovascular |                                          |                                                |
| 6- MISSISSAUGA HALTON    | 350             | 256<br>(73.1%)                          | 297<br>(84.9%)                                | 257<br>(73.4%)               | 55<br>(15.7%)                | 59<br>(16.9%)  | 91<br>(26.0%)        | 41<br>(11.7%)                            | \$74,532                                       |
| 8- CENTRAL               | 722             | 514<br>(71.2%)                          | 633<br>(87.7%)                                | 546<br>(75.6%)               | 100<br>(13.9%)               | 106<br>(14.7%) | 172<br>(23.8%)       | 84<br>(11.6%)                            | \$67,711                                       |
| 5- CENTRAL WEST          | 389             | 266<br>(68.4%)                          | 326<br>(83.8%)                                | 259<br>(66.6%)               | 38<br>(9.8%)                 | 69<br>(17.7%)  | 86<br>(22.1%)        | 44<br>(11.3%)                            | \$65,705                                       |
| 11- CHAMPLAIN            | 709             | 452<br>(63.8%)                          | 615<br>(86.7%)                                | 472<br>(66.6%)               | 67<br>(9.4%)                 | 123<br>(17.3%) | 153<br>(21.6%)       | 100<br>(14.1%)                           | \$75,650                                       |
| 7- TORONTO CENTRAL       | 649             | 431<br>(66.4%)                          | 574<br>(88.4%)                                | 457<br>(70.4%)               | 55 (8.5%)                    | 94<br>(14.5%)  | 129<br>(19.9%)       | 57<br>(8.8%)                             | \$72,772                                       |
| 9- CENTRAL EAST          | 1,146           | 701<br>(61.2%)                          | 1,020<br>(89.0%)                              | 834<br>(72.8%)               | 101<br>(8.8%)                | 91<br>(7.9%)   | 168<br>(14.7%)       | 155<br>(13.5%)                           | \$57,051                                       |
| 3- WATERLOO WELLINGTON   | 482             | 319<br>(66.2%)                          | 408<br>(84.6%)                                | 365<br>(75.7%)               | 50<br>(10.4%)                | 79<br>(16.4%)  | 107<br>(22.2%)       | 74<br>(15.4%)                            | \$56,284                                       |
| 1- ERIE ST. CLAIR        | 483             | 333<br>(68.9%)                          | 420<br>(87.0%)                                | 390<br>(80.7%)               | 65<br>(13.5%)                | 38<br>(7.9%)   | 90<br>(18.6%)        | 110<br>(22.8%)                           | \$72,535                                       |
| 12- NORTH SIMCOE MUSKOKA | 398             | 268<br>(67.3%)                          | 370<br>(93.0%)                                | 322<br>(80.9%)               | 62<br>(15.6%)                | 31<br>(7.8%)   | 79<br>(19.8%)        | 55<br>(13.8%)                            | \$54,793                                       |
| 2- SOUTH WEST            | 834             | 569<br>(68.2%)                          | 726<br>(87.1%)                                | 631<br>(75.7%)               | 77<br>(9.2%)                 | 47<br>(5.6%)   | 110<br>(13.2%)       | 171<br>(20.5%)                           | \$58,745                                       |
| 10- SOUTH EAST           | 487             | 306<br>(62.8%)                          | 415<br>(85.2%)                                | 346<br>(71.0%)               | 38<br>(7.8%)                 | 35<br>(7.2%)   | 69<br>(14.2%)        | 94<br>(19.3%)                            | \$51,189                                       |
| 4- HAMILTON NIAGARA      | 1,399           | 940<br>(67.2%)                          | 1,220<br>(87.2%)                              | 1,076<br>(76.9%)             | 215<br>(15.4%)               | 139<br>(9.9%)  | 290<br>(20.7%)       | 142<br>(10.2%)                           | \$59,288                                       |
| 13- NORTH-EAST           | 769             | 552<br>(71.8%)                          | 679<br>(88.3%)                                | 534<br>(69.4%)               | 67<br>(8.7%)                 | 24<br>(3.1%)   | 81<br>(10.5%)        | 184<br>(23.9%)                           | \$61,716                                       |
| 14- NORTH-WEST           | 415             | 285<br>(68.7%)                          | 376<br>(90.6%)                                | 201<br>(48.4%)               | 18<br>(4.3%)                 | 10<br>(2.4%)   | 22<br>(5.3%)         | 50<br>(12.0%)                            | \$63,113                                       |

<sup>a</sup> Regions are ordered from lowest to highest major amputation rate

<sup>b</sup> ED – Emergency Department

<sup>c</sup> Minor amputation – below ankle

<sup>d</sup> Costs in 2017 Canadian dollars from the perspective of Ontario Ministry of Health & Long Term Care

**Supplemental Table S6. Revascularization on Index Hospitalization – Diabetes-related Amputations**

| Region <sup>a</sup>      | No. of amputees | Revascularization – N (%) |              |                      |
|--------------------------|-----------------|---------------------------|--------------|----------------------|
|                          |                 | Open surgery              | Endovascular | Open or endovascular |
| 6- MISSISSAUGA HALTON    | 350             | 35 (10.0%)                | 31 (8.9%)    | 56 (16.0%)           |
| 8- CENTRAL               | 722             | 46 (6.4%)                 | 44 (6.1%)    | 82 (11.4%)           |
| 5- CENTRAL WEST          | 389             | 39 (10.0%)                | 29 (7.5%)    | 61 (15.7%)           |
| 11- CHAMPLAIN            | 709             | 89 (12.6%)                | 46 (6.5%)    | 120 (16.9%)          |
| 7- TORONTO CENTRAL       | 649             | 43 (6.6%)                 | 28 (4.3%)    | 62 (9.6%)            |
| 9- CENTRAL EAST          | 1,146           | 62 (5.4%)                 | 51 (4.5%)    | 102 (8.9%)           |
| 3- WATERLOO WELLINGTON   | 482             | 25 (5.2%)                 | 27 (5.6%)    | 45 (9.3%)            |
| 1- ERIE ST. CLAIR        | 483             | 20 (4.1%)                 | 37 (7.7%)    | 54 (11.2%)           |
| 12- NORTH SIMCOE MUSKOKA | 398             | 21 (5.3%)                 | 24 (6.0%)    | 42 (10.6%)           |
| 2- SOUTH WEST            | 834             | 20 (2.4%)                 | 36 (4.3%)    | 50 (6.0%)            |
| 10- SOUTH EAST           | 487             | 21 (4.3%)                 | 14 (2.9%)    | 34 (7.0%)            |
| 4- HAMILTON NIAGARA      | 1,399           | 54 (3.9%)                 | 119 (8.5%)   | 151 (10.8%)          |
| 13- NORTH-EAST           | 769             | 8 (1.0%)                  | 35 (4.6%)    | 43 (5.6%)            |
| 14- NORTH-WEST           | 415             | 10 (2.4%)                 | 10 (2.4%)    | 16 (3.9%)            |

<sup>a</sup> Regions are ordered from lowest to highest major amputation rate

**Supplemental Table S7.** Correlation of Regional Health Provider Counts and Health Care Utilization Among Diabetic Amputees with Regional Rates of Diabetes-related Major Amputation

|                                                                                                                                    | Range of Values Across<br>14 Regions | Pearson Correlation Coefficient <sup>4</sup><br>[95% CI] |
|------------------------------------------------------------------------------------------------------------------------------------|--------------------------------------|----------------------------------------------------------|
| <b>Health Providers Per Capita within Each Region<sup>1</sup></b>                                                                  |                                      |                                                          |
| Count of Vascular Surgeons                                                                                                         | 0 – 1.9                              | - 0.44 [-0.78; 0.13]                                     |
| Count of Chiropractors-Podiatrists                                                                                                 | 3.7 – 36.6                           | - 0.37 [-0.75; 0.21]                                     |
| Count of Orthopedic Surgeons                                                                                                       | 5.5 – 15.0                           | 0.16 [-0.41; 0.63]                                       |
| Count of Vascular, General and Orthopedic Surgeons                                                                                 | 14.1 – 33.4                          | 0.27 [-0.31; 0.69]                                       |
| Count of General Surgeons                                                                                                          | 8.3 – 16.5                           | 0.45 [-0.12; 0.78]                                       |
| <b>Health Provider Visit Among Amputees – At least 1 Visit Within 1 Year Prior to Index Amputation Hospitalization<sup>2</sup></b> |                                      |                                                          |
| Vascular Surgeon Visit                                                                                                             | 4.1% – 61.4%                         | - 0.74 [-0.91; -0.31]                                    |
| Publicly-Funded Podiatry Visit <sup>3</sup>                                                                                        | 0.0% – 8.2%                          | - 0.41 [-0.77; 0.16]                                     |
| Vascular, General or Orthopedic Surgeon Visit                                                                                      | 56.1% – 83.7%                        | - 0.40 [-0.76; 0.18]                                     |
| General Practitioner Physician Visit                                                                                               | 90.4% – 97.5%                        | - 0.06 [-0.57; 0.49]                                     |
| Orthopedic Surgeon Visit                                                                                                           | 17.8% – 36.0%                        | 0.21 [-0.37; 0.66]                                       |
| Specialist Physician Visit                                                                                                         | 92.2% – 96.1%                        | 0.51 [-0.05; 0.81]                                       |
| General Surgeon Visit                                                                                                              | 9.7% – 45.0%                         | 0.54 [-0.01; 0.83]                                       |
| <b>Health Services and Interventions Among Amputees - Within 1 Year Prior to Index Amputation Hospitalization</b>                  |                                      |                                                          |
| Endovascular or Open Vascular Intervention                                                                                         | 5.3% – 26.0%                         | - 0.89 [-0.96; -0.67]                                    |
| Endovascular Intervention                                                                                                          | 2.4% – 17.7%                         | - 0.81 [-0.93; -0.47]                                    |
| Outpatient Nursing Care                                                                                                            | 48.4% – 80.9%                        | - 0.60 [-0.85; -0.07]                                    |
| Open Vascular Intervention                                                                                                         | 4.3% – 15.7%                         | - 0.56 [-0.83; -0.01]                                    |
| Total Health Care Costs                                                                                                            | \$51,189 – \$75,650                  | - 0.42 [-0.77; 0.16]                                     |
| Hospitalization (at least one)                                                                                                     | 61.2% – 73.1%                        | - 0.01 [-0.54; 0.52]                                     |
| Minor Amputation                                                                                                                   | 8.8% – 23.9%                         | 0.25 [-0.33; 0.68]                                       |
| Emergency Department visit (at least one)                                                                                          | 83.9% – 90.0%                        | 0.47 [-0.01; 0.79]                                       |
| <b>Intervention - Index Amputation Hospitalization</b>                                                                             |                                      |                                                          |
| Endovascular or Open Vascular Intervention                                                                                         | 3.9% – 16.9 %                        | - 0.78 [-0.92; -0.39]                                    |
| Open Vascular Intervention                                                                                                         | 1.0% – 12.6%                         | - 0.71 [-0.89; -0.26]                                    |
| Endovascular Intervention                                                                                                          | 2.4% – 8.9%                          | - 0.60 [-0.85; -0.08]                                    |

<sup>1</sup> Counts of providers per 100,000 residents ≥40 years of age

<sup>2</sup> Excluding 30 days prior to amputation

<sup>3</sup> The majority of podiatry and chiropractic visits are not publicly funded in Ontario

<sup>4</sup> Negative coefficient denotes an inverse relationship. The magnitude of specific correlations can be interpreted according to the following criteria (where r is the absolute value of the coefficient): 0.1 < r ≤ 0.3 denotes weak correlation; 0.3 < r ≤ 0.5 denotes moderate correlation; r > 0.5 denotes strong correlation.<sup>22</sup>
